# Supplementary material
Source: publisher figshare collection journal article supplement (https://tandf.figshare.com/ndownloader/files/14941241)
Supplement: Supplementary file 1 [file 14941241]

### Types of costs associated

#### Labor cost

It is usually the largest cost factor in any fabrication process. Equation (1) and equation (2) are used for calculating the labor cost. The operator factor is taken into consideration for set up time, electrode and filler change over time etc.

#### Filler metal cost

The filler metal cost includes three factors i.e. weight of filler metal deposits that depends on size of the groove, filer metal cost and deposition efficiency. Deposition efficiency in TIG welding is nearly equal to 100 % because of no/very less filler metal is lost through spatter, vaporization or stub end loss. Equation (3) is used to calculate the filler metal cost.

#### Shielding gas cost

The calculation for cost of shielding gas involves arc time, gas flow rate and the cost for the type of shielding gas. Equation (4) is used for shielding gas cost calculation.

#### Power consumption cost

Power consumption cost is calculated in same way for both welding processes. Equation (5) is used for calculation of cost of power consumption.

#### Flux cost

In A-TIG welding, activated flux paste is applied on plates before welding. Therefore, cost of flux is an additional cost involved only with A-TIG welding process. Equation (9) is used for calculation of flux cost.

For cost calculation, per unit cost of consumables and services were considered as:

labor cost= 100 Rs./h, filler wire= 3700 Rs./Kg, Ar gas= 100 Rs./L, electricity= 8 Rs./kWh, TiO2 powder= 200 Rs./kg and acetone cost= 600 Rs./L.
